# Supplementary material for: Isotopic fractionation of N 2 O to quantify N 2 O reduction to N 2 – validation with Helium incubation and 15 N gas flux methods
Source: Copernicus journal article supplement (doi:10.5194/bg-2016-276), 2016-08-30
Supplement: Supplementary file 1 [file bg-2016-276-supplement.pdf]

## S1 Terms and abbreviations

| GENERAL TERMS                                            |                                                                                                                                                                                                                                                                                                                                                                                                                              |
|----------------------------------------------------------|------------------------------------------------------------------------------------------------------------------------------------------------------------------------------------------------------------------------------------------------------------------------------------------------------------------------------------------------------------------------------------------------------------------------------|
| N <sub>2</sub> O and N <sub>2</sub> isotopologues        | molecules differing in mass due to isotopic substitution ( <sup>14</sup> N <sup>14</sup> N - <sup>15</sup> N <sup>14</sup> N or <sup>14</sup> N <sup>14</sup> N <sup>16</sup> O - <sup>15</sup> N <sup>14</sup> N <sup>16</sup> O)                                                                                                                                                                                           |
| N <sub>2</sub> O isotopocules                            | molecules differing in either the number or positions of isotopic substitutions = isotopologues ( <sup>14</sup> N <sup>14</sup> N <sup>16</sup> O - <sup>15</sup> N <sup>14</sup> N <sup>16</sup> O or <sup>14</sup> N <sup>14</sup> N <sup>16</sup> O - <sup>14</sup> N <sup>14</sup> N <sup>18</sup> O) + isotopomers ( <sup>14</sup> N <sup>15</sup> N <sup>16</sup> O - <sup>15</sup> N <sup>14</sup> N <sup>16</sup> O) |
| Min soil                                                 | mineral arable soil with silt loam texture classified as a <i>Haplic Luvisol</i>                                                                                                                                                                                                                                                                                                                                             |
| Org soil                                                 | organic grassland soil classified as <i>Histic Gleysol</i>                                                                                                                                                                                                                                                                                                                                                                   |
| Exp1                                                     | Experiment 1 - soil incubations in He and He+O <sub>2</sub> atmosphere                                                                                                                                                                                                                                                                                                                                                       |
| Exp2                                                     | Experiment 2 – parallel soil incubations with and without <sup>15</sup> N addition                                                                                                                                                                                                                                                                                                                                           |
| NA treatment                                             | treatment without <sup>15</sup> N addition (Exp2) - natural abundance                                                                                                                                                                                                                                                                                                                                                        |
| <sup>15</sup> N treatment                                | treatment with <sup>15</sup> N addition (Exp2) - <sup>15</sup> N labelled                                                                                                                                                                                                                                                                                                                                                    |
| WFPS                                                     | water-filled pore space                                                                                                                                                                                                                                                                                                                                                                                                      |
| <i>r</i> <sub>N2O</sub>                                  | residual N <sub>2</sub> O fraction                                                                                                                                                                                                                                                                                                                                                                                           |
| <i>y</i> <sub>N2</sub> ; <i>y</i> <sub>N2O</sub>         | mole fraction of N <sub>2</sub> ; N <sub>2</sub> O in total gas background                                                                                                                                                                                                                                                                                                                                                   |
| <i>f<sub>f</sub></i>                                     | fraction of N <sub>2</sub> O from fungal denitrification or nitrification                                                                                                                                                                                                                                                                                                                                                    |
| <i>n</i>                                                 | nitrification rate pro soil amount and time                                                                                                                                                                                                                                                                                                                                                                                  |
| <i>DNRA</i>                                              | rate of dissimilatory nitrate reduction to ammonium pro soil amount and time                                                                                                                                                                                                                                                                                                                                                 |
| <i>m</i>                                                 | minimal N mineralisation rate pro soil amount and time                                                                                                                                                                                                                                                                                                                                                                       |
| <i>i</i>                                                 | N immobilisation rate pro soil amount and time                                                                                                                                                                                                                                                                                                                                                                               |
| [N <sub>2</sub> O] flux                                  | N <sub>2</sub> O released pro soil amount and time                                                                                                                                                                                                                                                                                                                                                                           |
| [N <sub>2</sub> O+N <sub>2</sub> ] flux                  | total N gases released pro soil amount and time                                                                                                                                                                                                                                                                                                                                                                              |
| NATURAL ABUNDANCE ISOTOPIC ANALYSES                      |                                                                                                                                                                                                                                                                                                                                                                                                                              |
| $\delta^{18}\text{O}_{\text{N}_2\text{O}}$               | oxygen isotopic signature of N <sub>2</sub> O                                                                                                                                                                                                                                                                                                                                                                                |
| $\delta^{15}\text{N}_{\text{N}_2\text{O}}^{\text{bulk}}$ | nitrogen isotopic signature of N <sub>2</sub> O - average value for both N atoms                                                                                                                                                                                                                                                                                                                                             |
| $\delta^{15}\text{N}_{\text{N}_2\text{O}}^{\text{sp}}$   | site preference of nitrogen isotopic signature of N <sub>2</sub> O - difference in $\delta^{15}\text{N}$ between central and peripheral N atom                                                                                                                                                                                                                                                                               |
| $\delta_0$                                               | initial isotopic signature before N <sub>2</sub> O reduction                                                                                                                                                                                                                                                                                                                                                                 |
| $\delta_r$                                               | isotopic signature of residual N <sub>2</sub> O after reduction                                                                                                                                                                                                                                                                                                                                                              |
| $\eta_{\text{red}}$                                      | net isotope effect associated with N <sub>2</sub> O reduction                                                                                                                                                                                                                                                                                                                                                                |
| $\delta^{18}\text{O}_{\text{NO}_3^-}$                    | oxygen isotopic signature of NO <sub>3</sub> <sup>-</sup>                                                                                                                                                                                                                                                                                                                                                                    |
| $\delta^{15}\text{N}_{\text{NO}_3^-}$                    | nitrogen isotopic signature of NO <sub>3</sub> <sup>-</sup>                                                                                                                                                                                                                                                                                                                                                                  |
| $\delta^{15}\text{N}_{\text{NH}_4^+}$                    | nitrogen isotopic signature of NH <sub>4</sub> <sup>+</sup>                                                                                                                                                                                                                                                                                                                                                                  |
| <sup>15</sup> N LABELLED ANALYSES                        |                                                                                                                                                                                                                                                                                                                                                                                                                              |
| <i>a</i>                                                 | <sup>15</sup> N abundance: <i>a</i> <sup>15</sup> N                                                                                                                                                                                                                                                                                                                                                                          |
| <i>at%</i>                                               | atom percent of <sup>15</sup> N                                                                                                                                                                                                                                                                                                                                                                                              |
| <i>a</i> <sub>NO3-</sub>                                 | <sup>15</sup> N abundances in NO <sub>3</sub> <sup>-</sup>                                                                                                                                                                                                                                                                                                                                                                   |
| <i>a</i> <sub>NH4+</sub>                                 | <sup>15</sup> N abundances in NH <sub>4</sub> <sup>+</sup>                                                                                                                                                                                                                                                                                                                                                                   |
| <i>f<sub>p</sub></i>                                     | gas fraction originating from the <sup>15</sup> N-labelled pool                                                                                                                                                                                                                                                                                                                                                              |
| <i>f<sub>p</sub></i> <sub>N2</sub>                       | N <sub>2</sub> fraction originating from the <sup>15</sup> N-labelled pool                                                                                                                                                                                                                                                                                                                                                   |
| <i>f<sub>p</sub></i> <sub>N2O</sub>                      | N <sub>2</sub> O fraction originating from the <sup>15</sup> N-labelled pool                                                                                                                                                                                                                                                                                                                                                 |
| <i>a<sub>m</sub></i>                                     | measured <sup>15</sup> N abundance in total gas mixture                                                                                                                                                                                                                                                                                                                                                                      |
| <i>a<sub>bgd</sub></i>                                   | <sup>15</sup> N abundance of - non-labelled pool (atmospheric background or experimental matrix)                                                                                                                                                                                                                                                                                                                             |
| <i>a<sub>p</sub></i>                                     | calculated <sup>15</sup> N abundance of <sup>15</sup> N-labelled pool                                                                                                                                                                                                                                                                                                                                                        |
| <i>a<sub>p</sub></i> <sub>N2</sub>                       | calculated <sup>15</sup> N abundance of <sup>15</sup> N-labelled pool producing N <sub>2</sub>                                                                                                                                                                                                                                                                                                                               |
| <i>a<sub>p</sub></i> <sub>N2O</sub>                      | calculated <sup>15</sup> N abundance of <sup>15</sup> N-labelled pool producing N <sub>2</sub> O                                                                                                                                                                                                                                                                                                                             |
| <i>f<sub>N</sub></i> <sub>N2O</sub>                      | N <sub>2</sub> O fraction originating from non-labelled natural abundance pools, like NH <sub>4</sub> <sup>+</sup> or Norg                                                                                                                                                                                                                                                                                                   |
| <i>f<sub>H</sub></i> <sub>N2</sub>                       | N <sub>2</sub> fraction originating from hybrid pool                                                                                                                                                                                                                                                                                                                                                                         |
| <i>f<sub>H</sub></i> <sub>N2O</sub>                      | N <sub>2</sub> O fraction originating from hybrid pool                                                                                                                                                                                                                                                                                                                                                                       |

## S2 Results

### S2.1 Experiment 1 (Exp 1)

Here we show all the detailed results of Helium incubation experiment (Exp1) for Min (Figure S1(a)) and Org soil (Figure S1(b)). Results description can be found in paper Section 3.1.

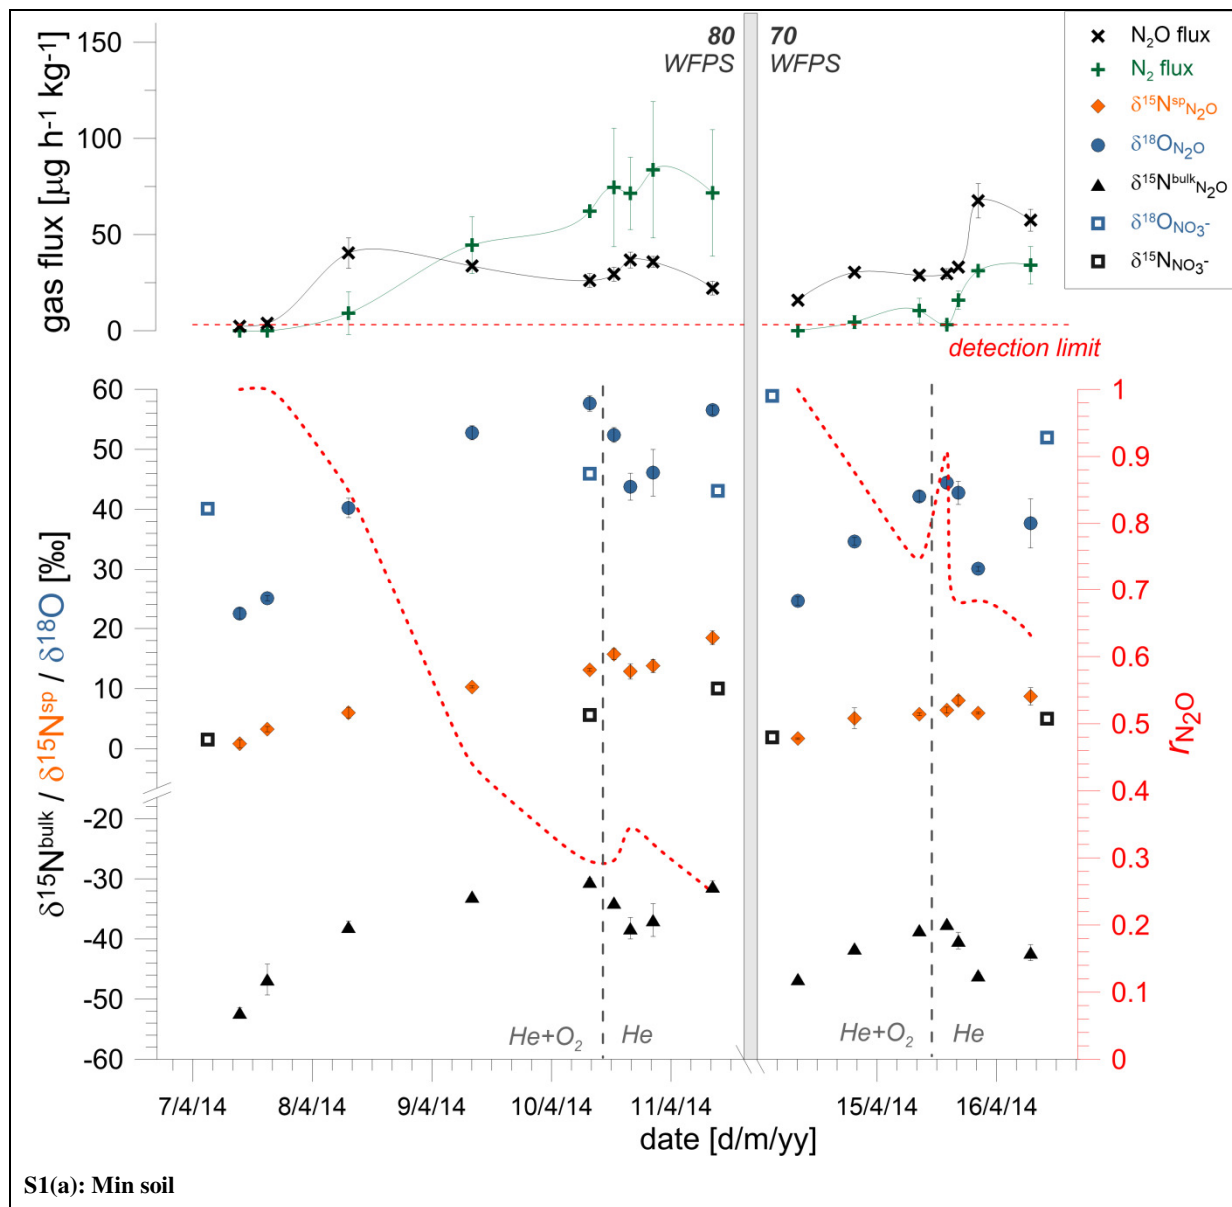

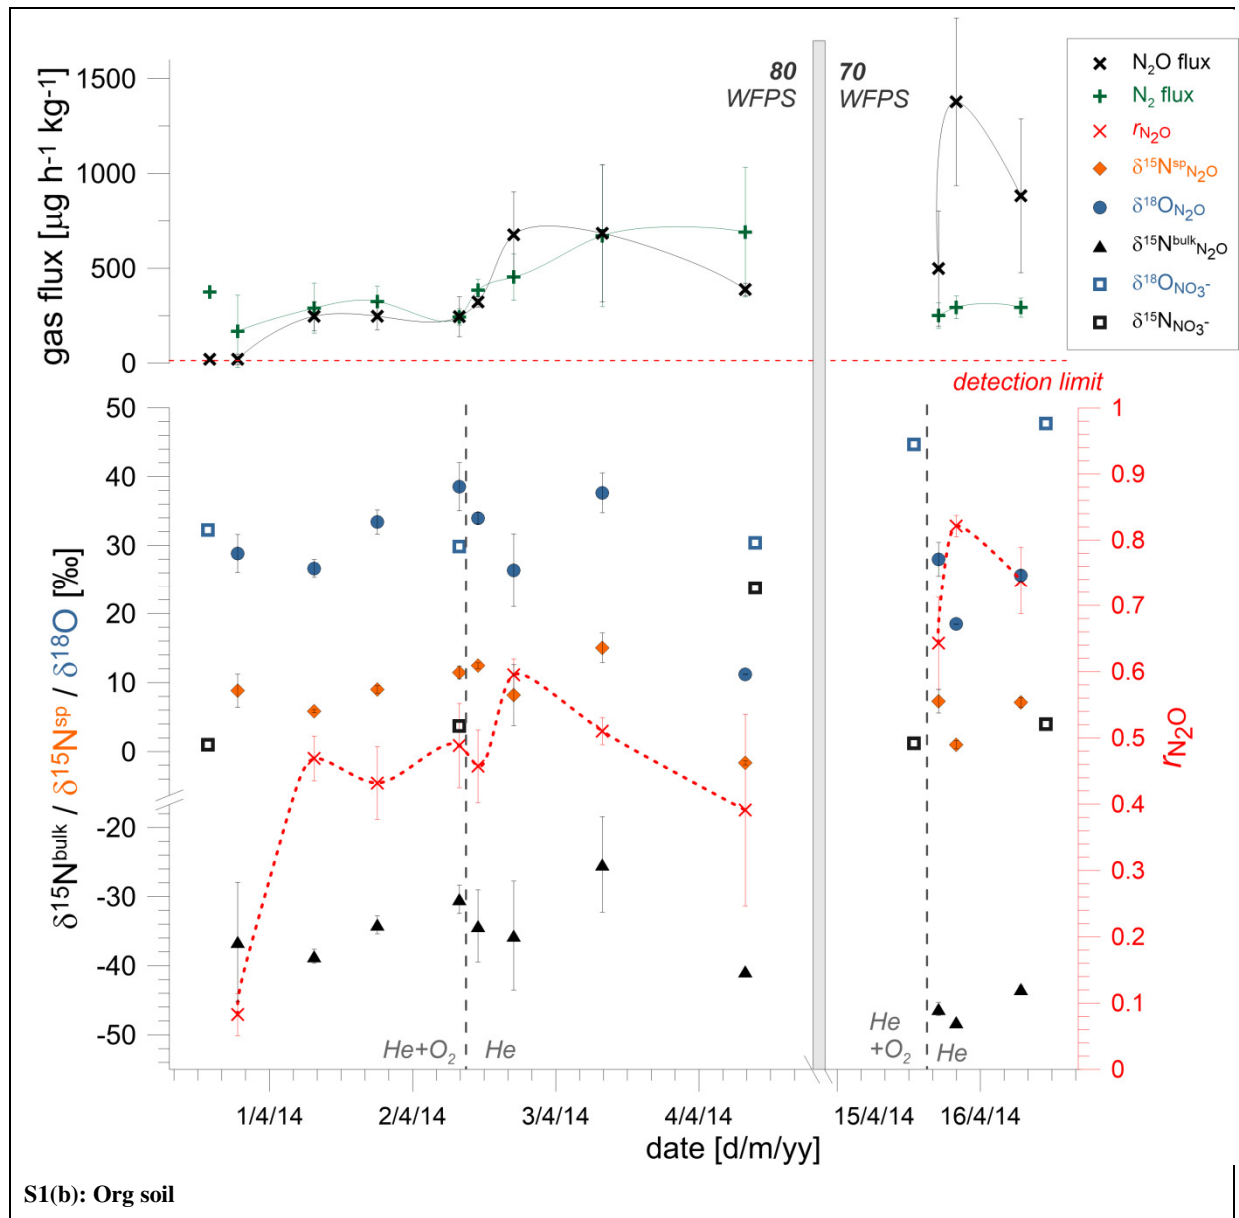

Figure S1: Measured  $\text{N}_2$  and  $\text{N}_2\text{O}$  gas fluxes (green and black crosses, upper graph), calculated  $\text{N}_2\text{O}$  residual fraction ( $r_{\text{N}_2\text{O}}$ ) (red crosses, lower graph),  $\text{N}_2\text{O}$  isotopocules ( $\delta^{18}\text{O}$  - blue circles;  $\delta^{15}\text{N}^{\text{sp}}$  - orange diamonds;  $\delta^{15}\text{N}^{\text{bulk}}$  - black triangles) from Exp1 for Min soil (a) and Org soil (b). Mean values and standard deviations ( $n=3$ ) are shown.  $\delta^{15}\text{N}$  and  $\delta^{18}\text{O}$  of extracted soil nitrate (black and blue squares) were determined at the beginning and at the end of the experiment.

## S2.1 Experiment 2 (Exp 2)

### S2.1.1 Natural abundance (NA) treatment, Exp2

Here we show all the detailed results of the natural abundance treatment of Experiment 2 (Exp2) for Min (Figure S2(a)) and Org soil (Figure S2(b)) incubated under anoxic (S2.1) and oxic (S2.2) atmosphere. Results description can be found in paper Section 3.2.1.

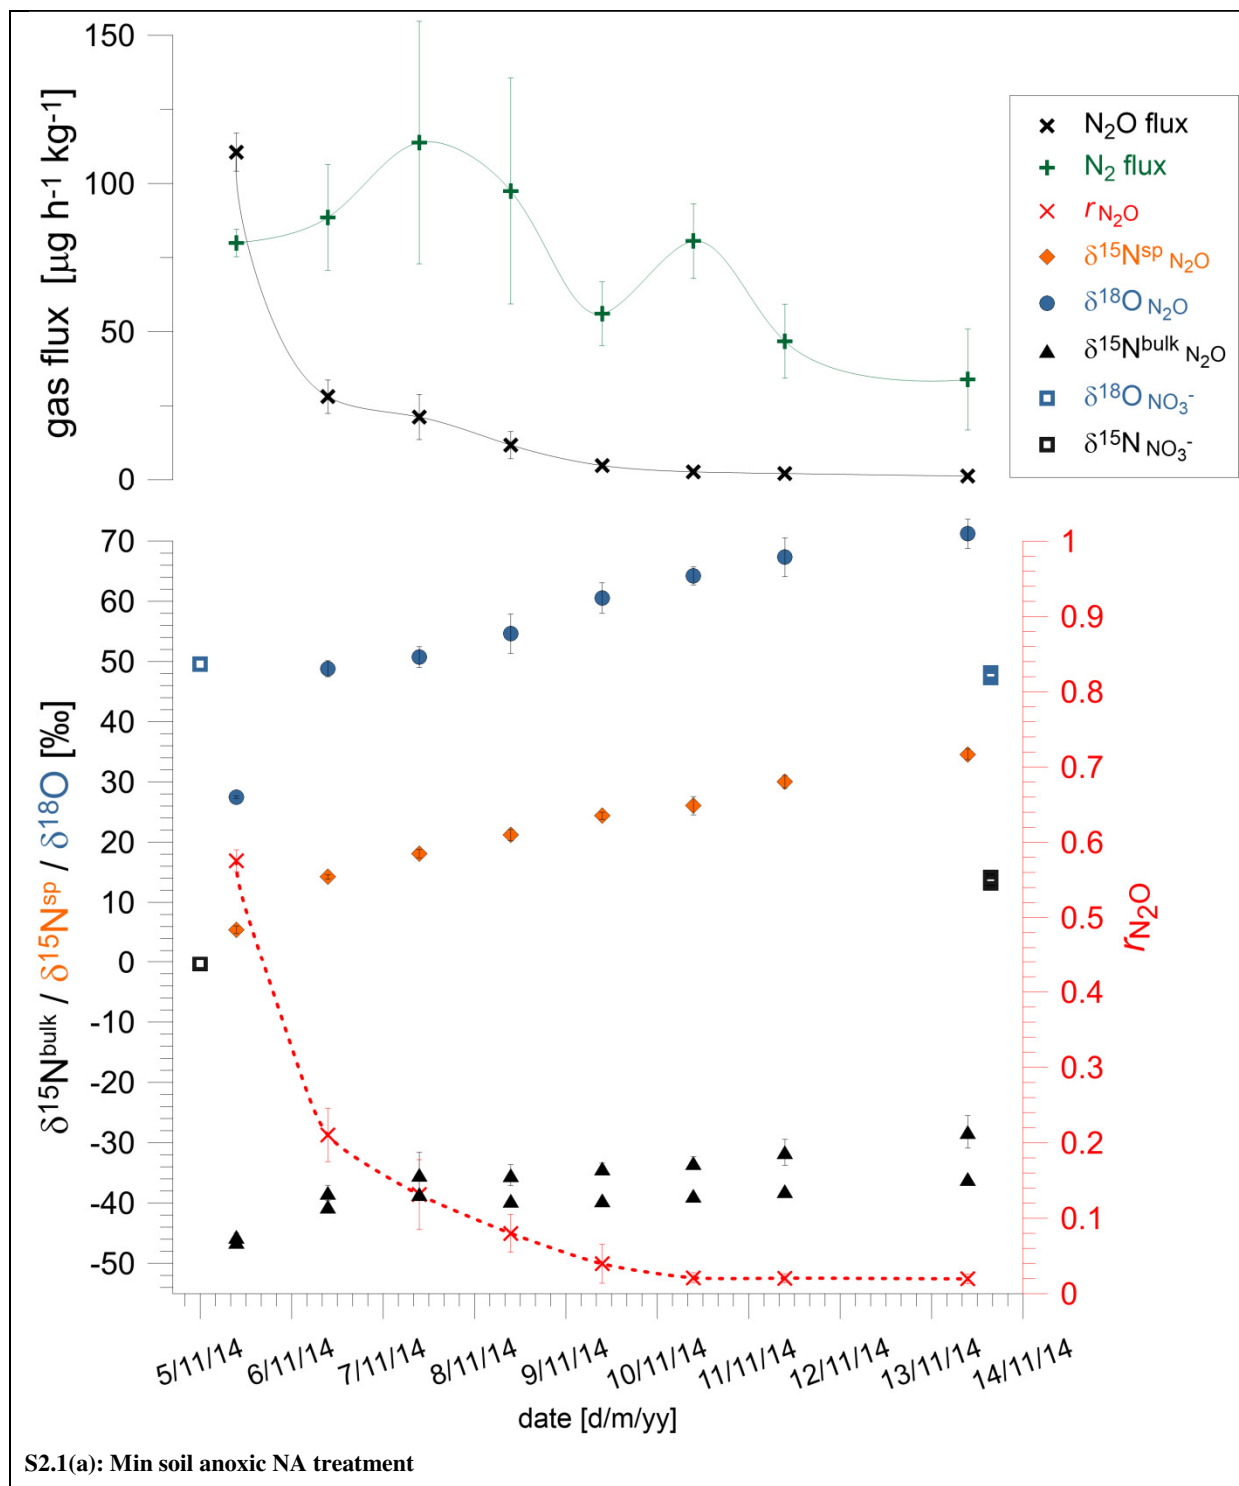

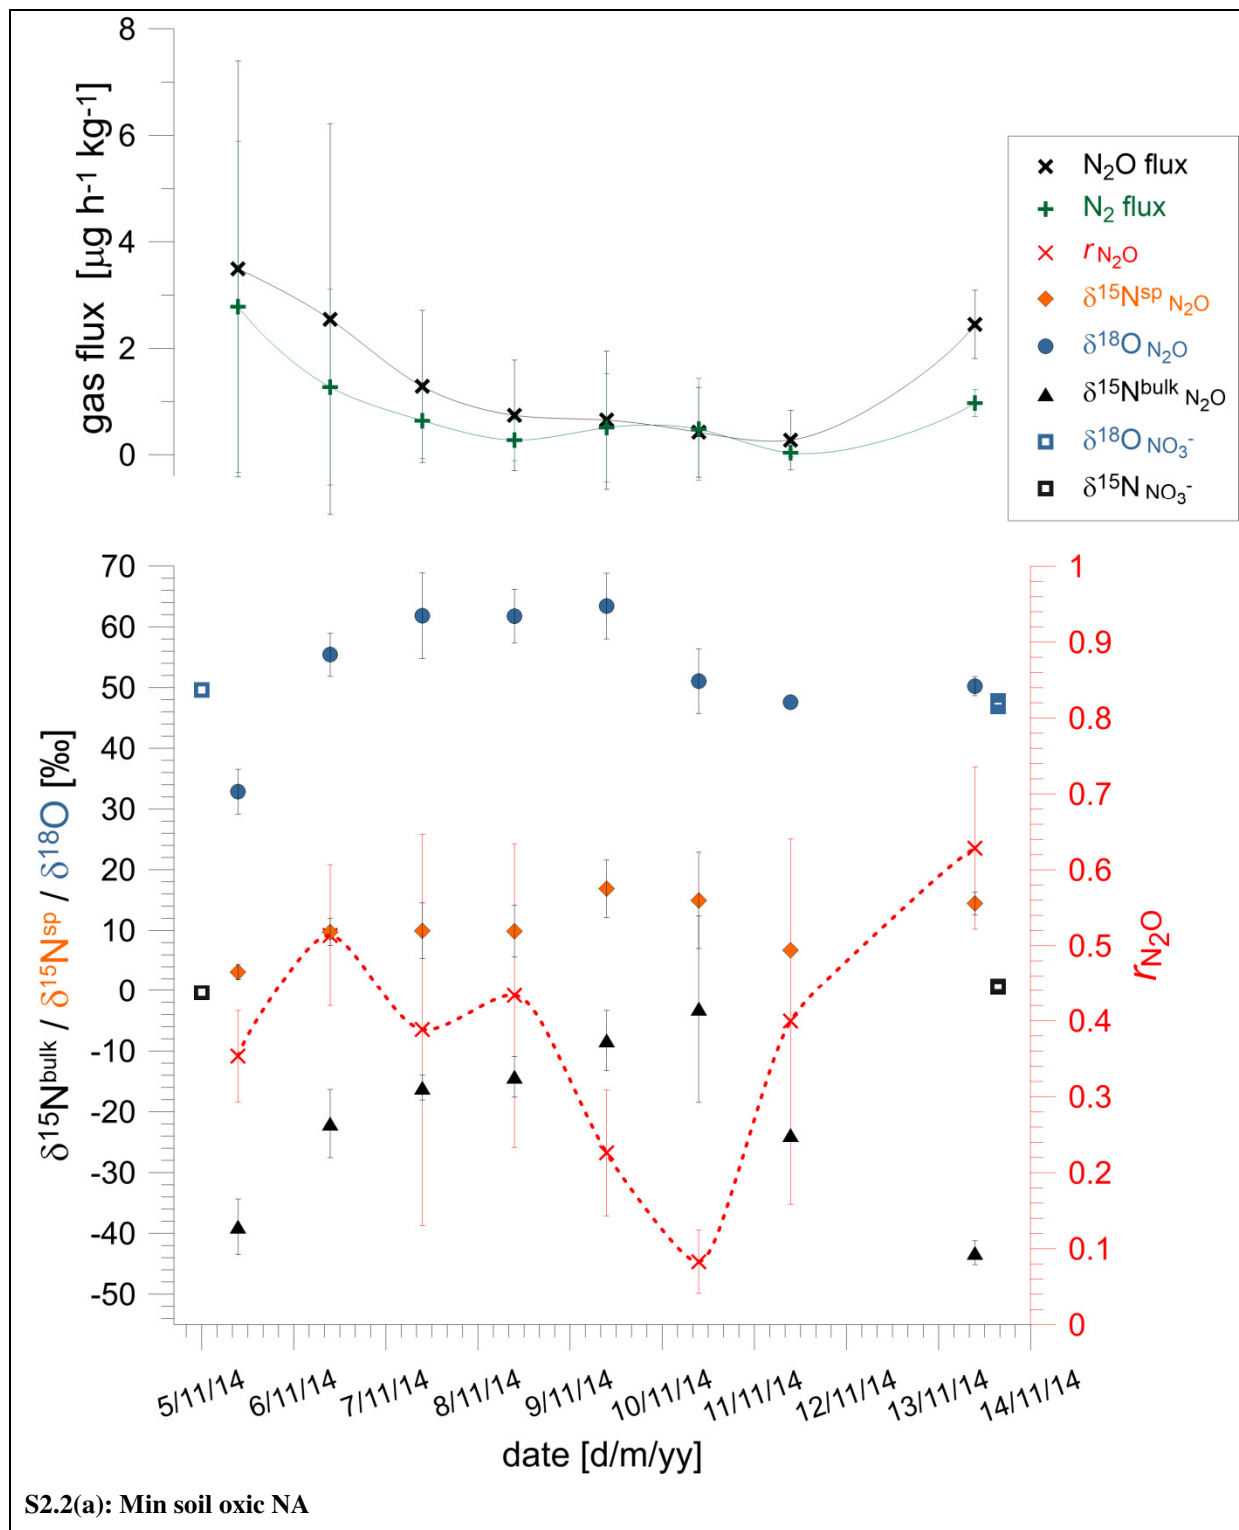

S2.2(a): Min soil oxie NA

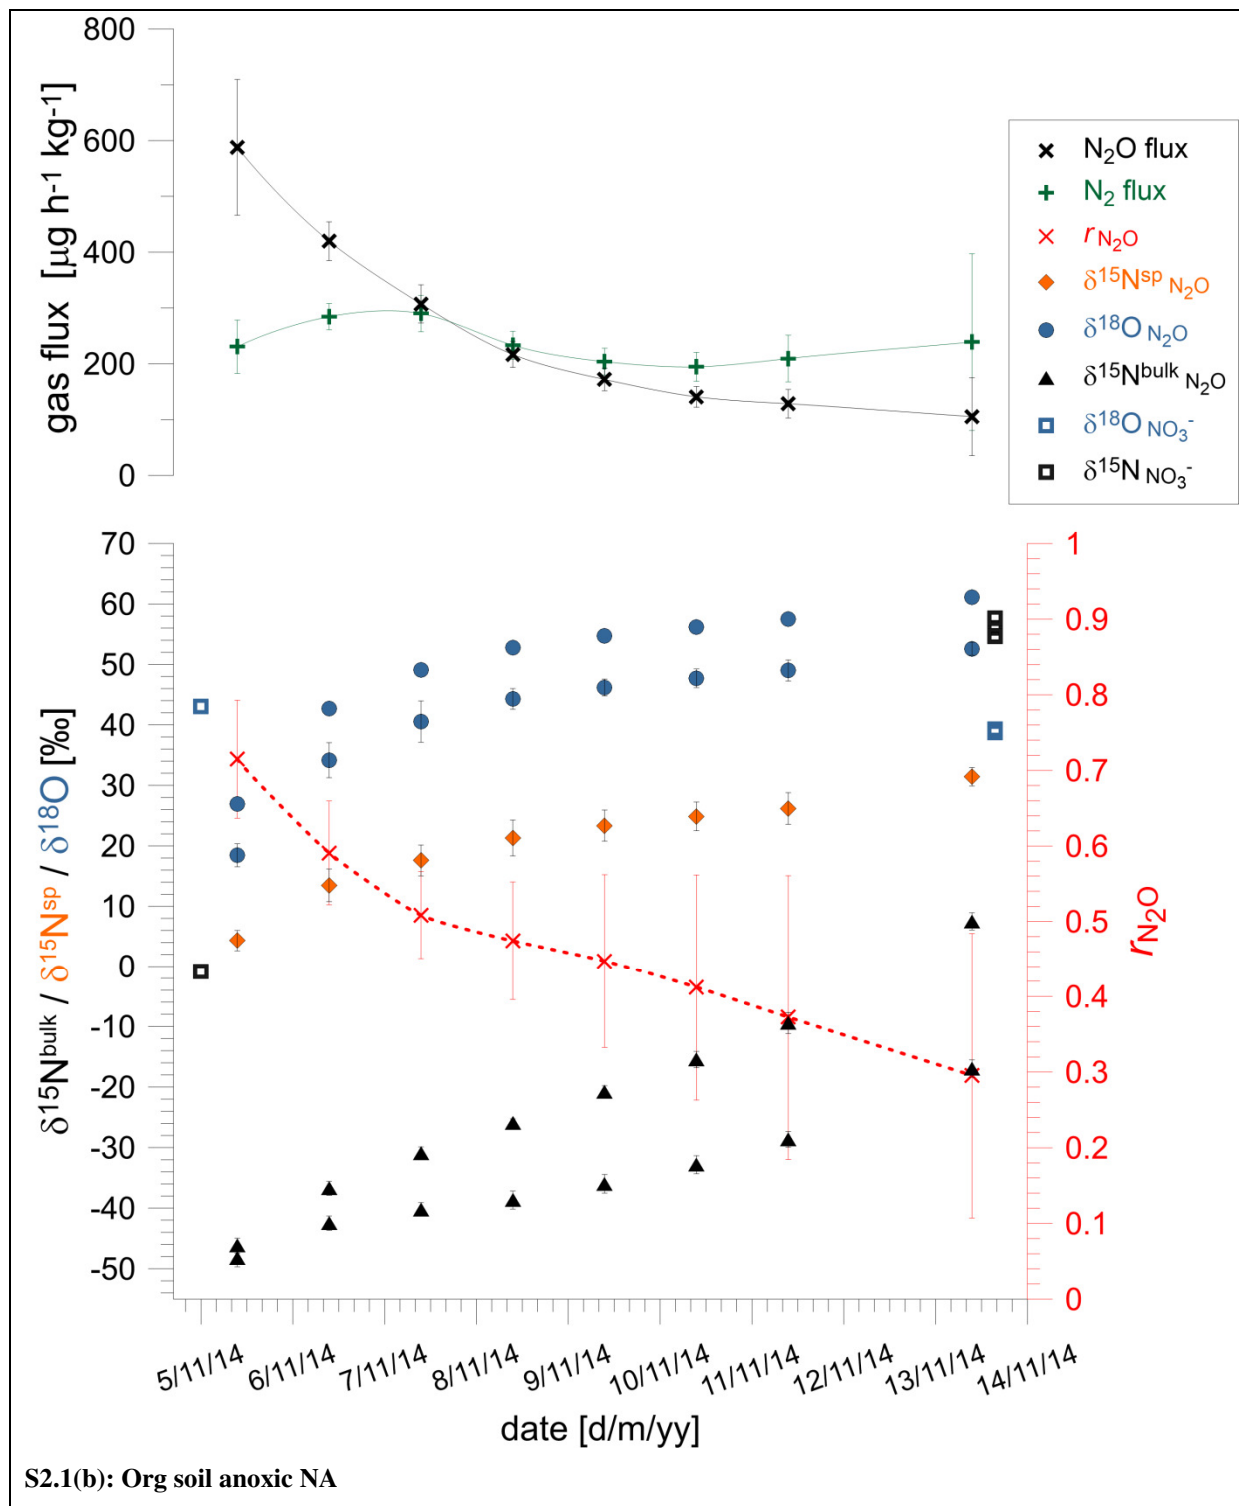

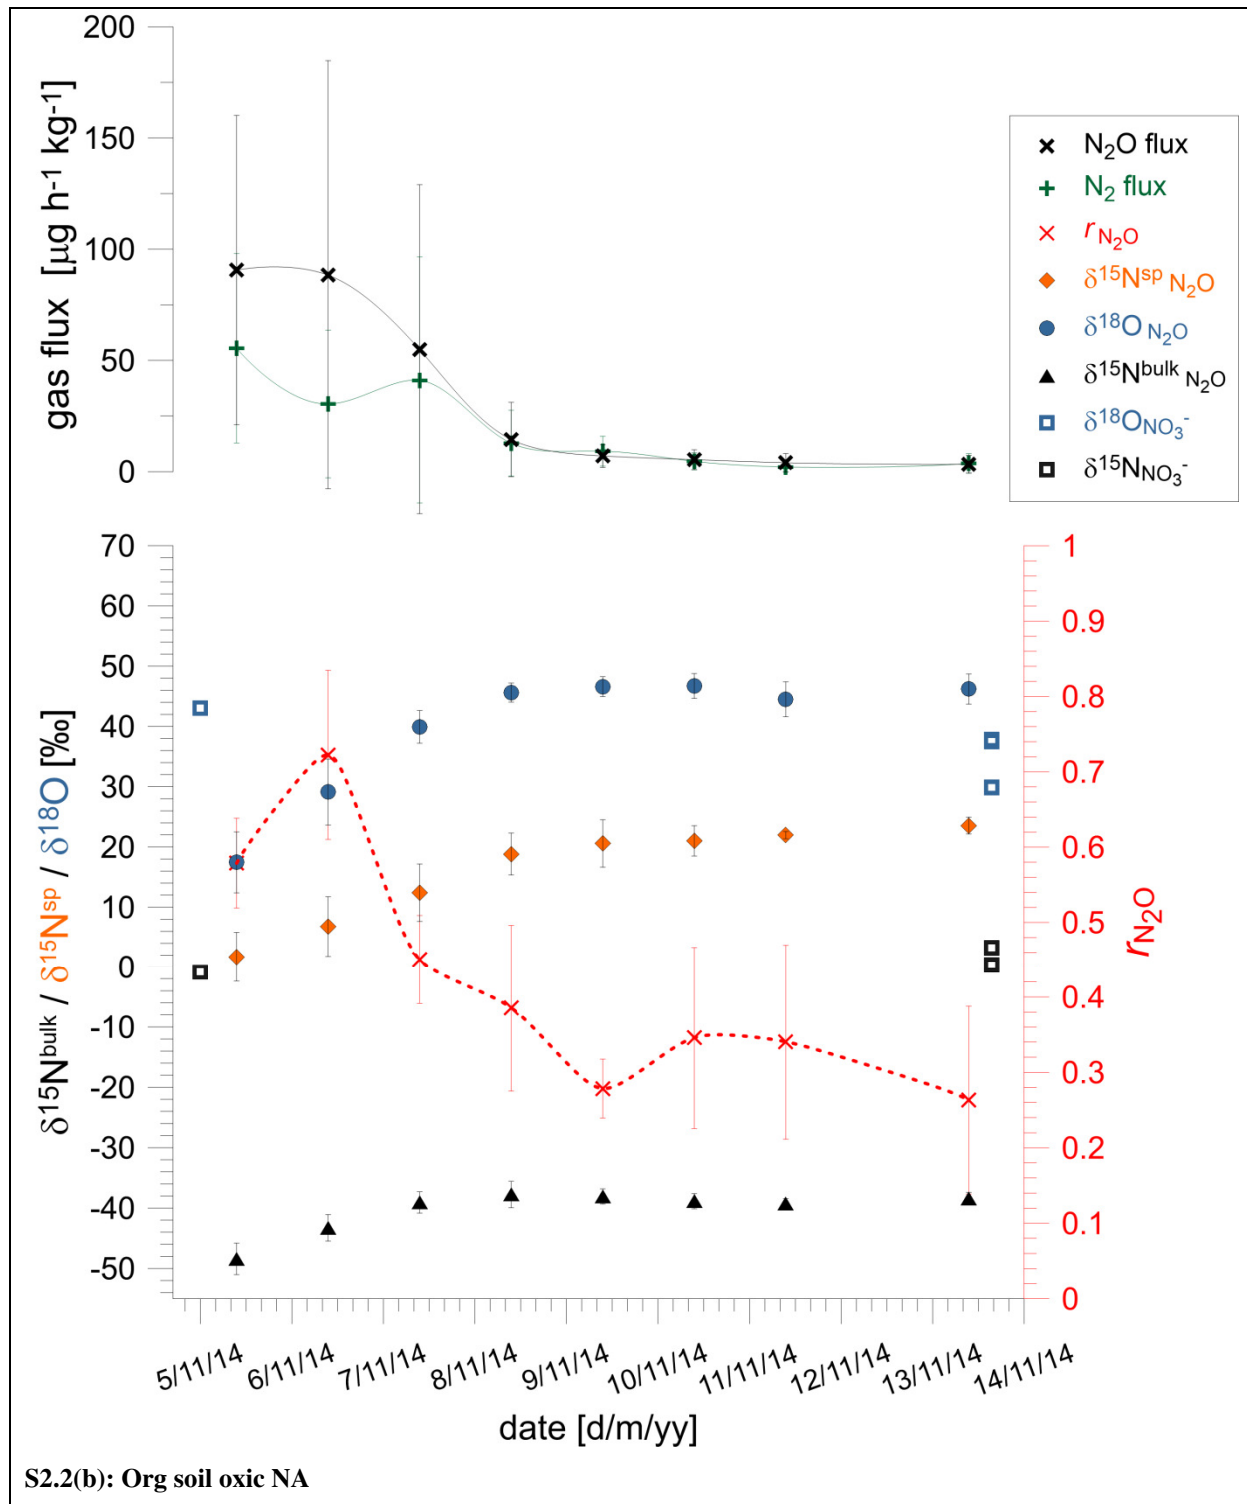

Figure S2: Data of natural abundance (NA) treatments for Min (A) and Org soil (B) incubated under anoxic (2.1) and oxic (2.2) atmosphere in Exp2. Mean values and standard deviations (n=4; n=3 for Org soil oxic treatment) are shown. Measured N<sub>2</sub>O gas fluxes (black crosses, upper graphs) with calculated N<sub>2</sub> fluxes (green crosses, upper graphs) from the residual N<sub>2</sub>O fraction determined with <sup>15</sup>N method, Eq. 6 (*r*<sub>N<sub>2</sub>O</sub>) (red crosses, lower graphs). N<sub>2</sub>O isotopic signatures (δ<sup>18</sup>O - blue circles; δ<sup>15</sup>N<sup>sp</sup> - orange diamonds; δ<sup>15</sup>N<sup>bulk</sup> - black triangles) measured daily; δ<sup>15</sup>N and δ<sup>18</sup>O of extracted soil nitrate (black and blue squares) determined at the beginning and at the end of the experiment.

### S2.1.2 $^{15}\text{N}$ treatment, Exp2

Here we show all the detailed results of the  $^{15}\text{N}$  treatment of Experiment 2 (Exp2) for Min (Figure S3(a)) and Org soil (Figure S3(b)) incubated under anoxic (S3.1) and oxic (S3.2) atmosphere. Results description can be found in paper Section 3.2.2.

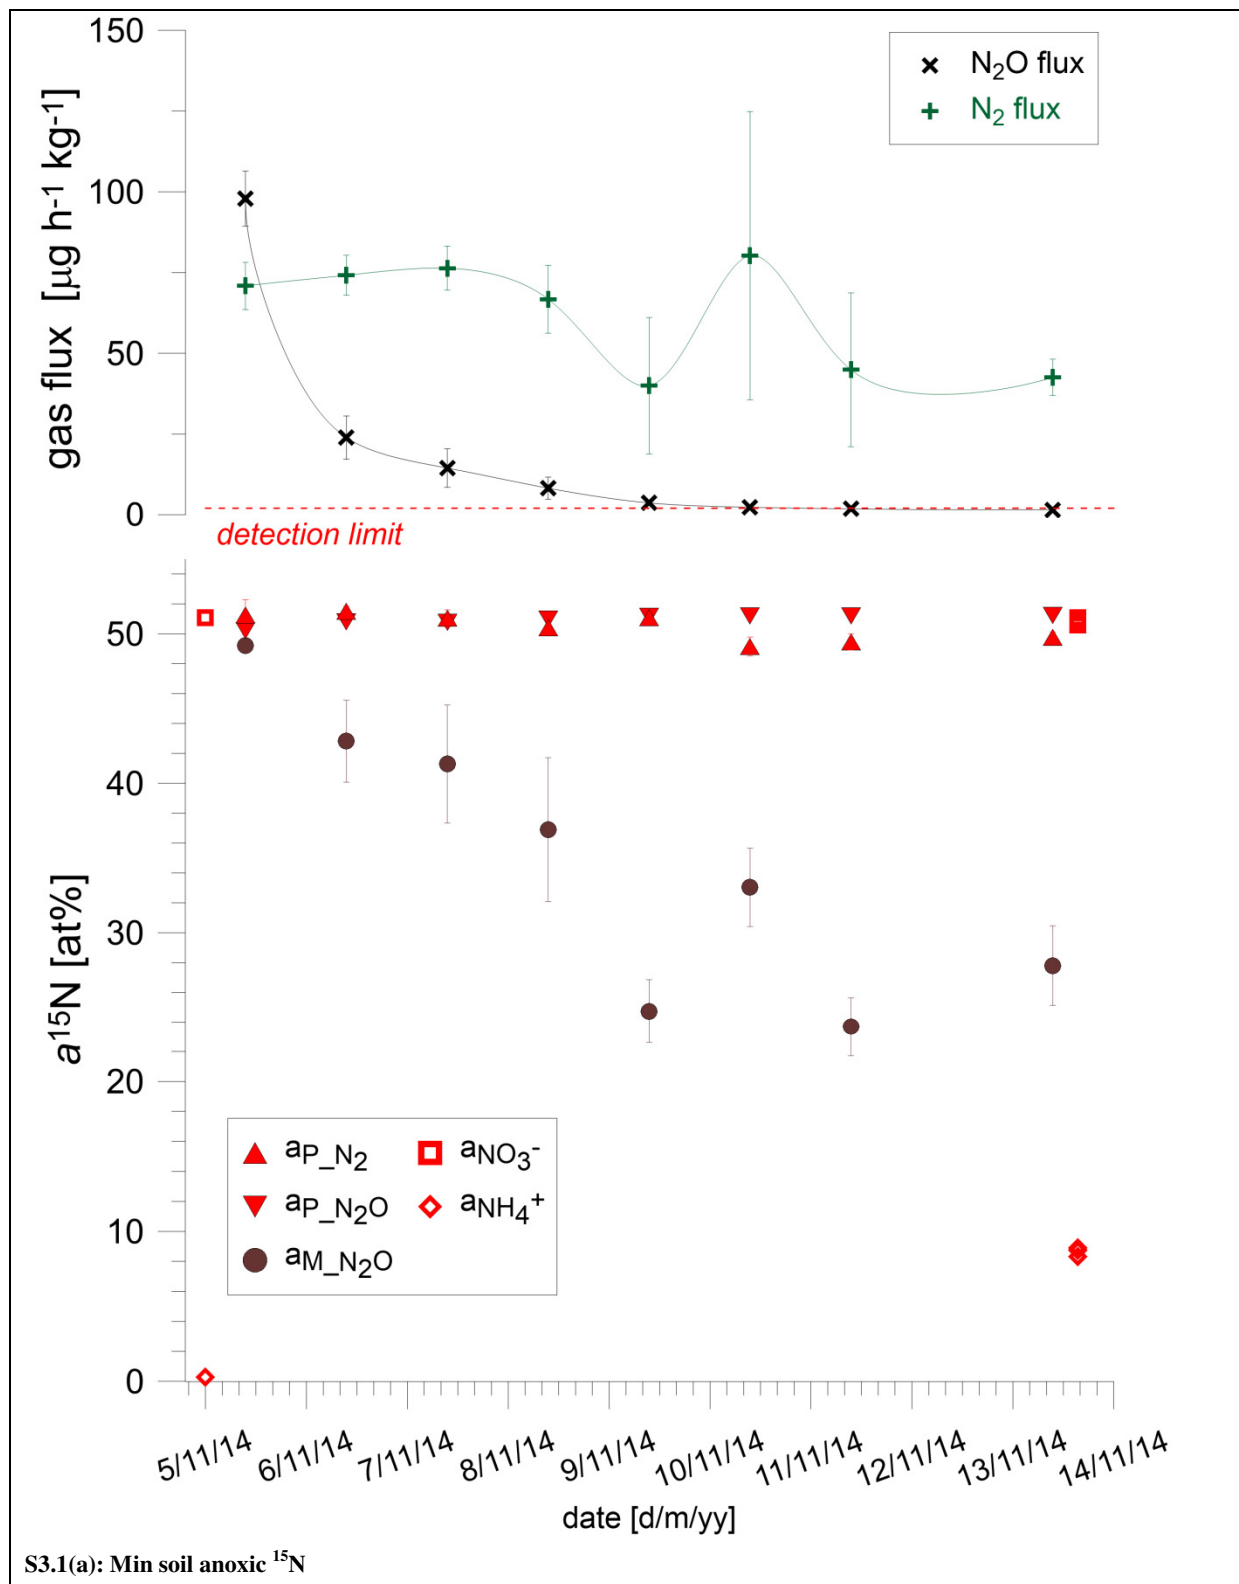



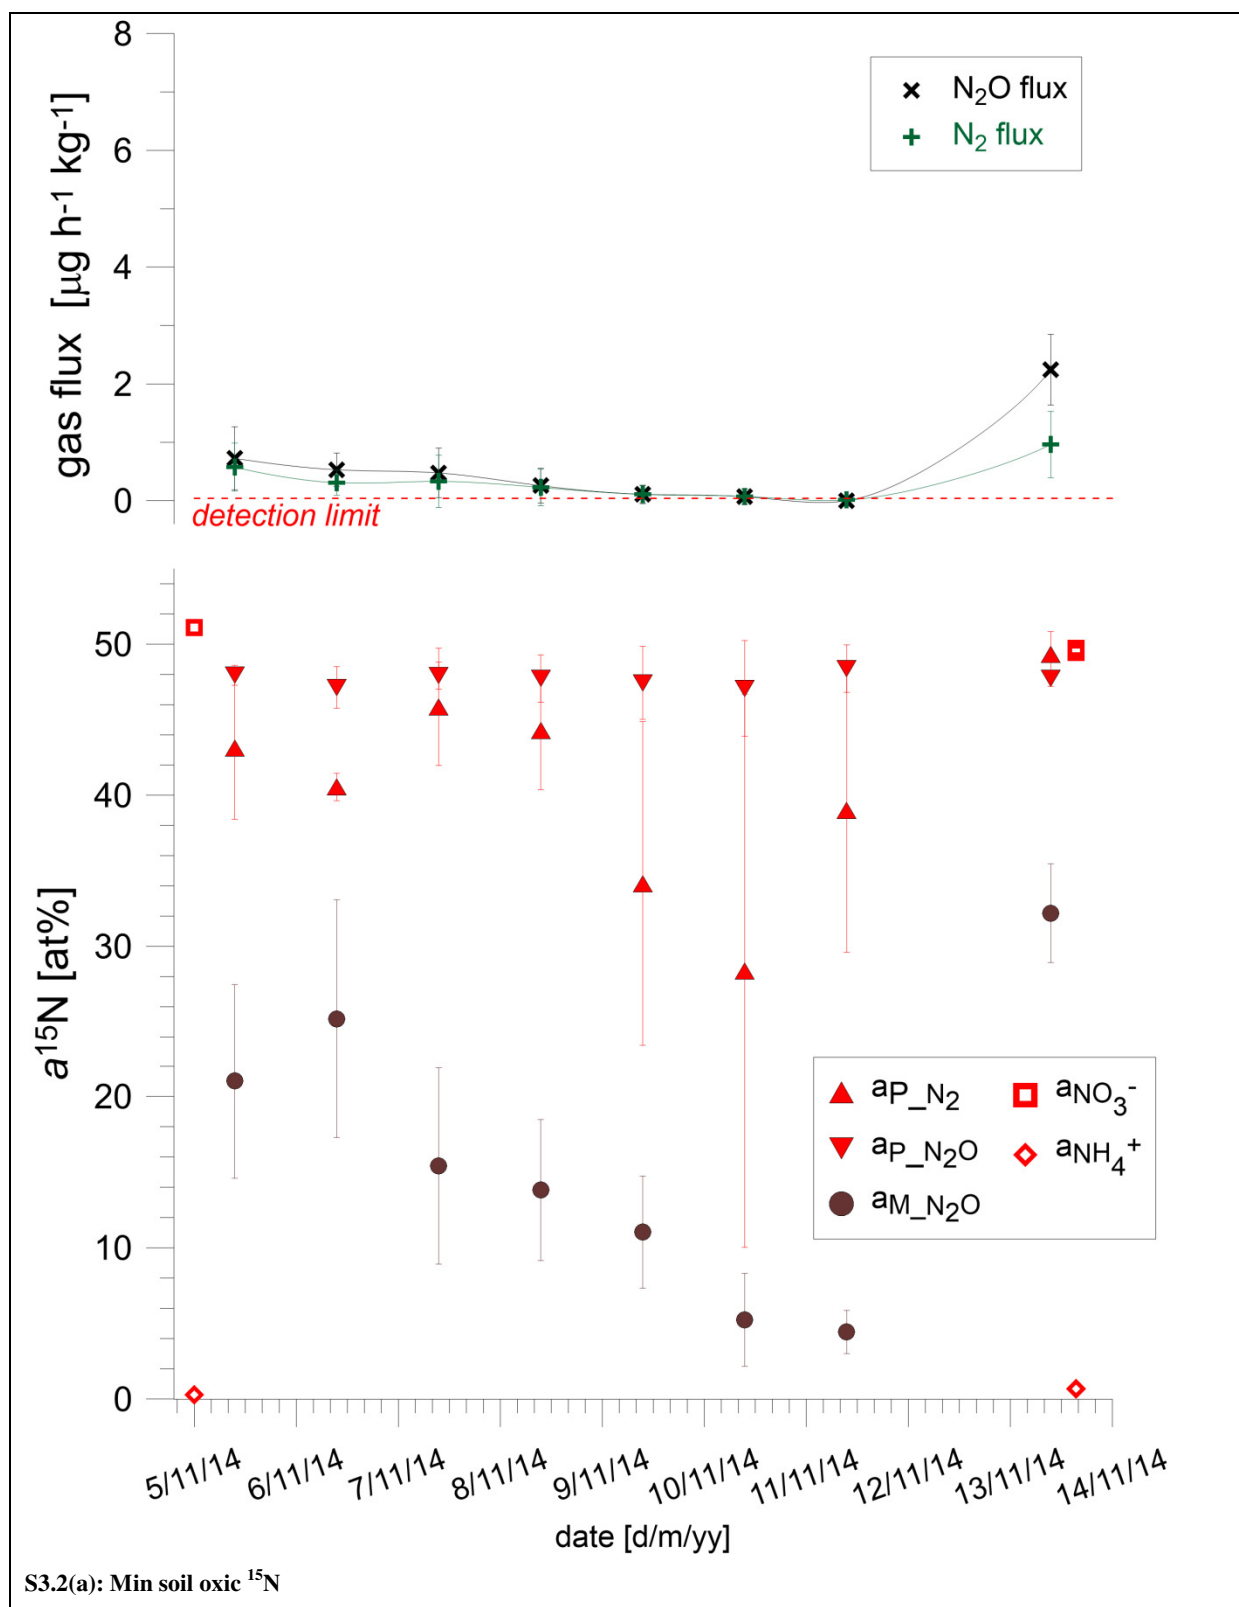

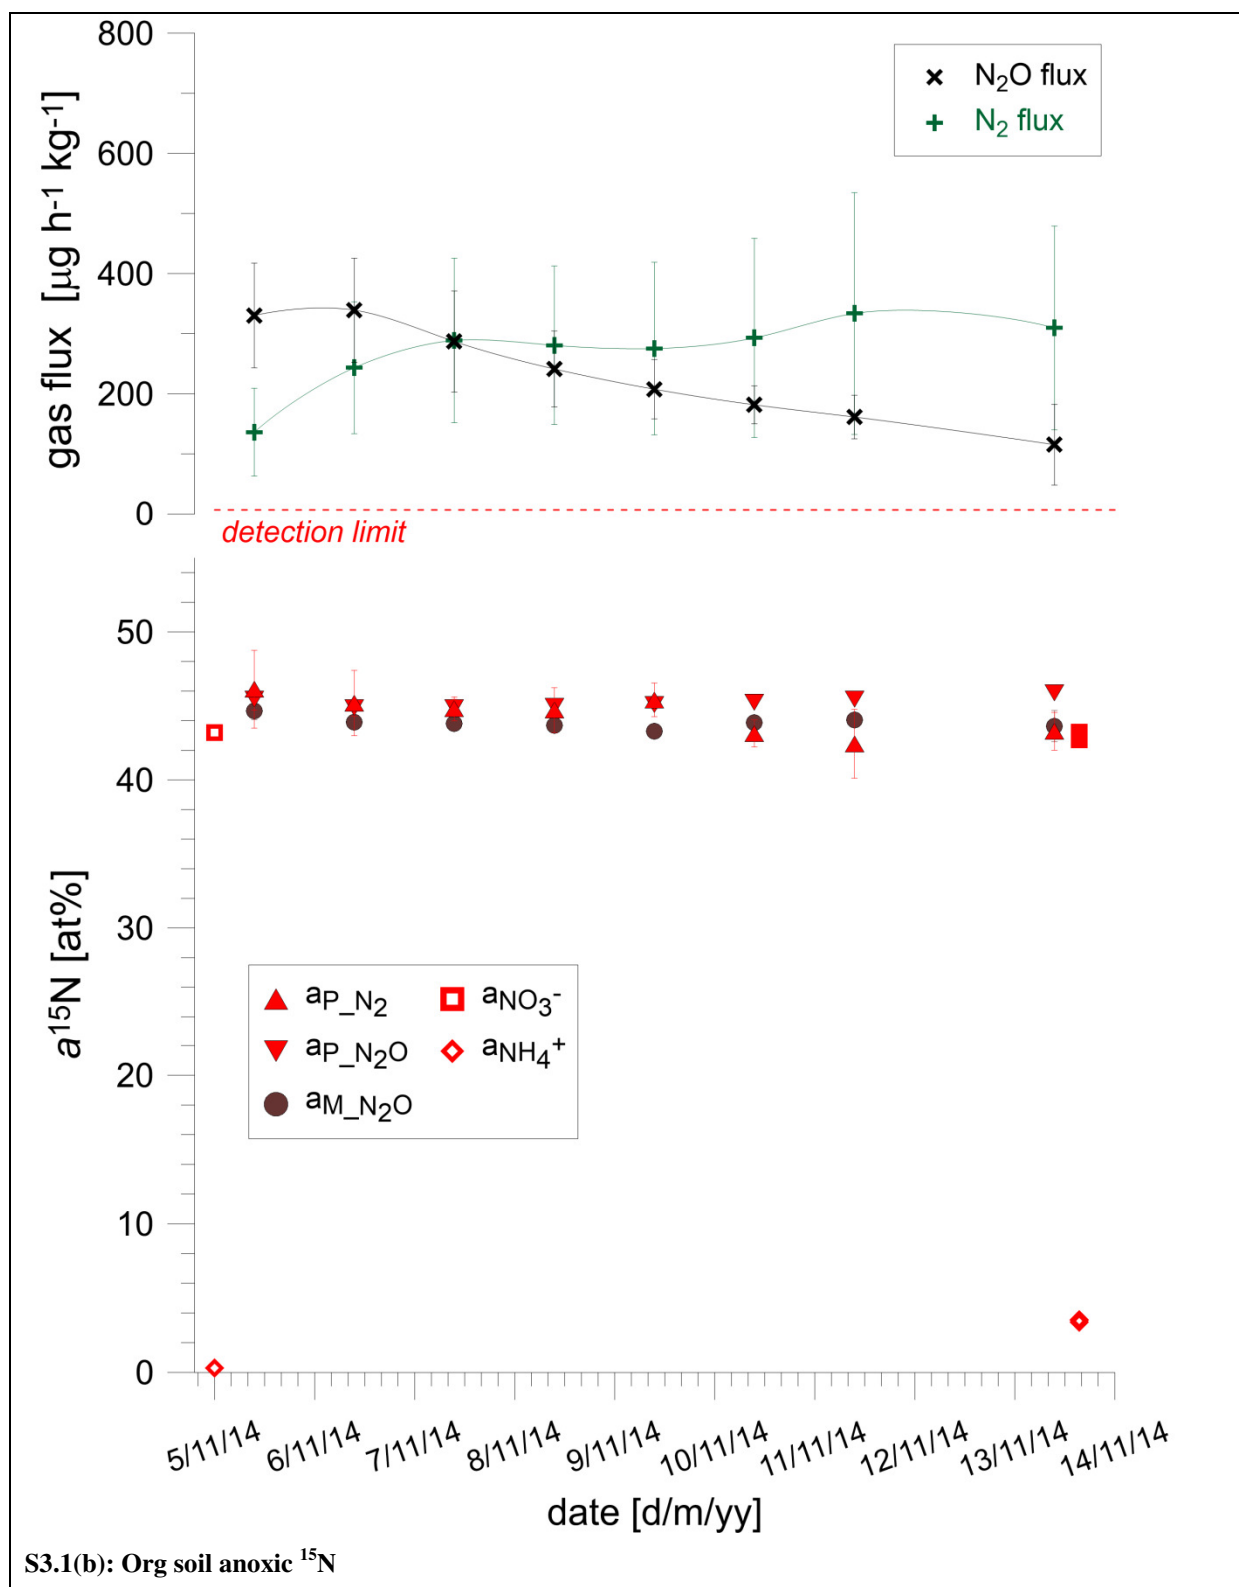

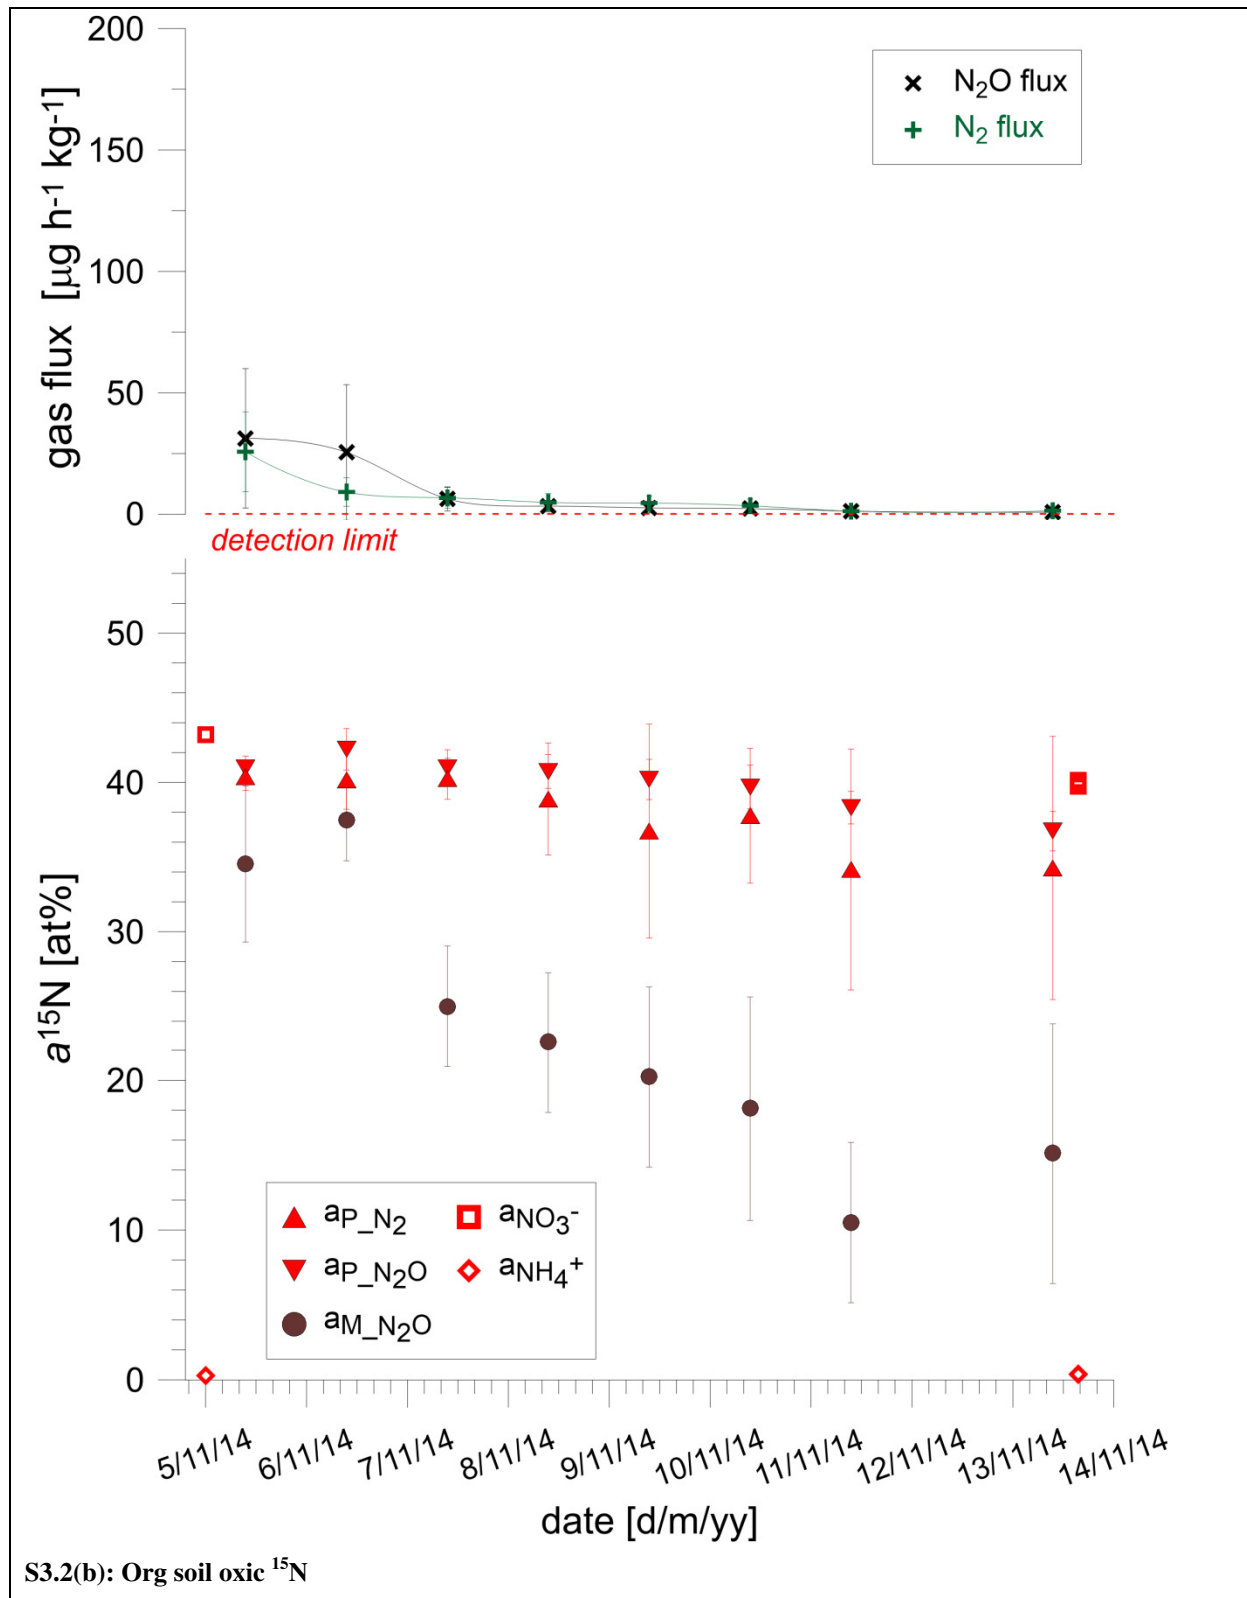

Figure S3: Data of  $^{15}\text{N}$  treatments for Min (A) and Org soil (B) incubated under anoxic (3.1) and oxie (3.2) atmosphere in Exp2. Mean values and standard deviations ( $n=4$ ;  $n=3$  for Org soil oxie treatment) are shown. Measured  $\text{N}_2\text{O}$  gas fluxes (black crosses, upper graphs) with calculated  $\text{N}_2$  fluxes (green crosses, upper graphs) from the calculated residual  $\text{N}_2\text{O}$  fraction, Eq.6 ( $r_{\text{N}_2\text{O}}$ ) (red crosses, lower graphs).

$^{15}\text{N}$  atom fractions ( $a^{15}\text{N}$ ): in total emitted  $\text{N}_2\text{O}$  representing the mixture of  $^{15}\text{N}$ -labelled and non-labelled  $\text{N}_2\text{O}$  ( $a_{\text{N}_2\text{O}}$  - brown circles); in  $^{15}\text{N}$ -pool derived  $\text{N}_2\text{O}$  representing  $^{15}\text{N}$  enrichment of active  $^{15}\text{N}$ -labelled pool producing  $\text{N}_2\text{O}$  ( $a_{\text{P}_\text{N}_2\text{O}}$  - red triangles), and in  $^{15}\text{N}$ -pool derived  $\text{N}_2$  representing  $^{15}\text{N}$  enrichment of active  $^{15}\text{N}$ -labelled pool producing  $\text{N}_2$  ( $a_{\text{P}_\text{N}_2}$  - red reversed triangles).  $^{15}\text{N}$  abundance measured in extracted mineral N: soil nitrate ( $a_{\text{NO}_3^-}$  - red squares) and ammonium ( $a_{\text{NH}_4^+}$  - red diamonds), at the beginning and at the end of the experiment.

**Table S1: Contents and isotopic signatures of mineral nitrogen pools of Exp 2. Rates of nitrification (*n*), mineralisation (*m*), *DNRA* and immobilisation (*i*) as calculated from mass balances (for NA treatment) and <sup>15</sup>N pool dilution (for <sup>15</sup>N treatment), Eqs. (15) - (18). All pools are expressed as mg N per kg dry soil, and rates as mg N per kg dry soil per 24 h. Values for natural abundance (NA) treatments and <sup>15</sup>N treatments are presented.**

| treatment       | NO <sub>3</sub> <sup>-</sup>                             |                                                  | NO <sub>3</sub> <sup>-</sup>                     |                                                          | NH <sub>4</sub> <sup>+</sup>                     |                                                  | NH <sub>4</sub> <sup>+</sup>                             |                                                          | N-transformations: calculated rates              |                                                                       |                             |                             |                                        |                             |
|-----------------|----------------------------------------------------------|--------------------------------------------------|--------------------------------------------------|----------------------------------------------------------|--------------------------------------------------|--------------------------------------------------|----------------------------------------------------------|----------------------------------------------------------|--------------------------------------------------|-----------------------------------------------------------------------|-----------------------------|-----------------------------|----------------------------------------|-----------------------------|
|                 | initial                                                  |                                                  | Final                                            |                                                          | initial                                          |                                                  | final                                                    |                                                          | <i>n</i>                                         | <i>f</i> <sub>N<sub>2</sub>O</sub> <sup>*</sup><br>[N <sub>2</sub> O] | <i>DNRA</i>                 | <i>m</i>                    | [N <sub>2</sub> +<br>N <sub>2</sub> O] | <i>i</i>                    |
| NA              | <i>c</i> <sub>NO3 0</sub><br>[mg N<br>kg <sup>-1</sup> ] | <i>δ</i> <sup>15</sup> N <sub>NO3 0</sub><br>[‰] | <i>δ</i> <sup>18</sup> O <sub>NO3 0</sub><br>[‰] | <i>c</i> <sub>NO3 t</sub><br>[mg N<br>kg <sup>-1</sup> ] | <i>δ</i> <sup>15</sup> N <sub>NO3 t</sub><br>[‰] | <i>δ</i> <sup>18</sup> O <sub>NO3 t</sub><br>[‰] | <i>c</i> <sub>NH4 0</sub><br>[mg N<br>kg <sup>-1</sup> ] | <i>c</i> <sub>NH4 t</sub><br>[mg N<br>kg <sup>-1</sup> ] |                                                  | [mg N<br>kg <sup>-1</sup> ]                                           | [mg N<br>kg <sup>-1</sup> ] | [mg N<br>kg <sup>-1</sup> ] | [mg N<br>kg <sup>-1</sup> ]            | [mg N<br>kg <sup>-1</sup> ] |
| Min Soil        |                                                          |                                                  |                                                  |                                                          |                                                  |                                                  |                                                          |                                                          |                                                  |                                                                       |                             |                             |                                        |                             |
| oxic            | 117.3                                                    | -0.3                                             | 49.6                                             | 98.7                                                     | 0.7                                              | 47.4                                             | 0.1                                                      | 0.0                                                      |                                                  | 0.02                                                                  |                             |                             | 0.05                                   | 1.81                        |
| anoxic          | 117.3                                                    | -0.3                                             | 49.6                                             | 80.5                                                     | 13.7                                             | 47.8                                             | 0.1                                                      | 0.9                                                      |                                                  | 0.05                                                                  |                             |                             | 2.29                                   | 1.39                        |
| Org Soil        |                                                          |                                                  |                                                  |                                                          |                                                  |                                                  |                                                          |                                                          |                                                  |                                                                       |                             |                             |                                        |                             |
| oxic            | 261.6                                                    | -0.9                                             | 43.0                                             | 236.1                                                    | 1.3                                              | 35.1                                             | 0.2                                                      | 0.1                                                      |                                                  | 0.15                                                                  |                             |                             | 0.96                                   | 1.59                        |
| anoxic          | 261.6                                                    | -0.9                                             | 43.0                                             | 76.3                                                     | 55.8                                             | 39.0                                             | 0.2                                                      | 11.6                                                     |                                                  | 0.13                                                                  |                             |                             | 11.01                                  | 7.52                        |
| <sup>15</sup> N | <i>c</i> <sub>NO3 0</sub><br>[mg N<br>kg <sup>-1</sup> ] | <i>a</i> <sup>15</sup> N <sub>NO3 0</sub><br>[‰] |                                                  | <i>c</i> <sub>NO3 t</sub><br>[mg N<br>kg <sup>-1</sup> ] | <i>a</i> <sup>15</sup> N <sub>NO3 t</sub><br>[‰] |                                                  | <i>c</i> <sub>NH4 0</sub><br>[mg N<br>kg <sup>-1</sup> ] | <i>c</i> <sub>NH4 t</sub><br>[mg N<br>kg <sup>-1</sup> ] | <i>a</i> <sup>15</sup> N <sub>NH4 t</sub><br>[‰] |                                                                       |                             |                             |                                        |                             |
| Min Soil        |                                                          |                                                  |                                                  |                                                          |                                                  |                                                  |                                                          |                                                          |                                                  |                                                                       |                             |                             |                                        |                             |
| oxic            | 111.8                                                    | 51.1                                             |                                                  | 92.8                                                     | 49.6                                             |                                                  | 0.0                                                      | 0.0                                                      | b.d.                                             | 0.30                                                                  | 0.01                        |                             | 0.31                                   | 2.18                        |
| anoxic          | 111.8                                                    | 51.1                                             |                                                  | 70.3                                                     | 50.8                                             |                                                  | 0.0                                                      | 1.0                                                      | 8.7                                              | 0.05                                                                  | 0.04                        | 0.02                        | 0.15                                   | 2.51                        |
| Org Soil        |                                                          |                                                  |                                                  |                                                          |                                                  |                                                  |                                                          |                                                          |                                                  |                                                                       |                             |                             |                                        |                             |
| oxic            | 270.9                                                    | 43.2                                             |                                                  | 223.8                                                    | 40.0                                             |                                                  | 0.2                                                      | 0.1                                                      | b.d.                                             | 1.93                                                                  | 0.07                        |                             | 1.99                                   | 6.29                        |
| anoxic          | 270.9                                                    | 43.2                                             |                                                  | 71.1                                                     | 43.0                                             |                                                  | 0.2                                                      | 11.9                                                     | 3.5                                              | 0.06                                                                  | 0.13                        | 0.10                        | 1.25                                   | 9.53                        |

### S3 Discussion: Relations between isotopic signatures

Here we show the relations between  $\text{N}_2\text{O}$  isotopic signatures:  $\delta^{15}\text{N}^{\text{sp}}/\delta^{18}\text{O}$  (Fig. S4.1),  $\delta^{15}\text{N}^{\text{sp}}/\delta^{15}\text{N}^{\text{bulk}}$  (Fig. S4.2),  $\delta^{18}\text{O}/\delta^{15}\text{N}^{\text{bulk}}$  (Fig. S4.3). The results from these graphs, *i.e.*, the calculated slopes are summarised in the paper in Table 3 and discussed in Section 3.4.3. On the graphs below we show the correlations slopes for calculated  $\delta_0$  values in black and for measured  $\delta$  values in grey.

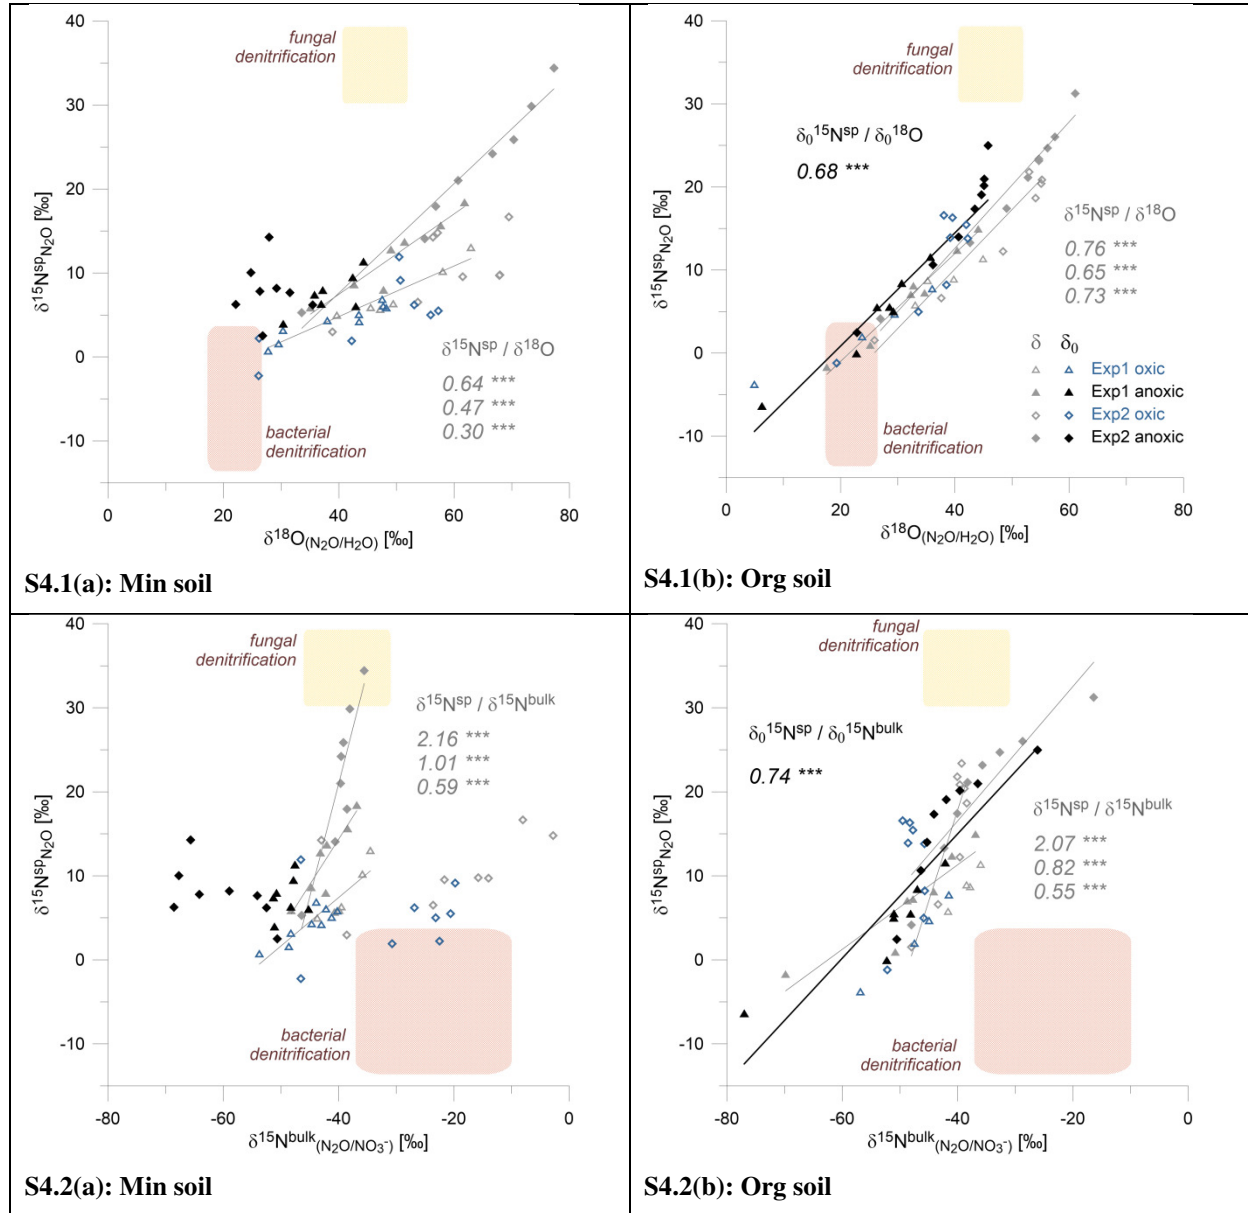

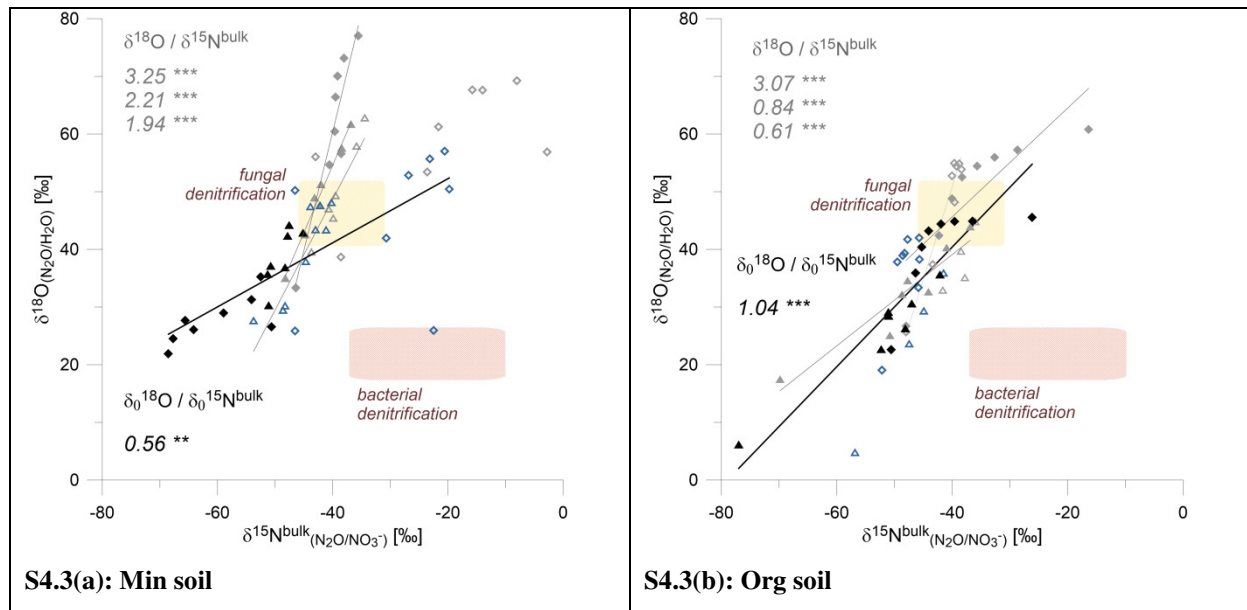

**Figure S4: Correlations between isotopic signatures for measured  $\delta$  values of residual  $N_2O$  after reduction (grey points) and for calculated  $\delta_0$  values after correction for  $N_2O$  reduction according to Eq. (13) (black points for anoxic treatments, blue points for oxic treatments). The slopes of linear regression lines are given for statistically significant correlations: for calculated  $\delta_0$  values (black font - slope for all samples jointly) and for measured  $\delta$  values (grey font - slopes for individual treatments). Min soil (a) and Org soil (b) shown. Given ranges are based on bacterial and fungal pure culture studies (Barford et al., 1999; Frame and Casciotti, 2010; Rohe et al., 2014b; Sutka et al., 2006; Toyoda et al., 2005) summarised by Toyoda et al. (2015) and controlled soil studies (Lewicka-Szczebak et al., 2016).**
